# Supplementary material for: Synthesis of Bax(Bi0.5Na0.5)1−xTiO3 perovskite mesocrystals via a solvothermal topochemical process
Source: Royal Society of Chemistry journal article supplement (doi:10.1039/c9ce00409b), 2019-01-01
Supplement: c9ce00409b1.pdf [file c9ce00409b1.pdf]

## Electronic Supplementary Information

# Synthesis of $\text{Ba}_x(\text{Bi}_{0.5}\text{Na}_{0.5})_{1-x}\text{TiO}_3$ Perovskite Mesocrystals via Solvothermal Topochemical Process

Weixing Zhao,<sup>a,b</sup> Wenxiong Zhang,<sup>a</sup> Yan Wang,<sup>b</sup> Dengwei Hu,<sup>b</sup> Xingang Kong,<sup>c</sup>  
Shinobu Uemura,<sup>a</sup> Takafumi Kusunose,<sup>a</sup> Qi Feng\*,<sup>a</sup>

<sup>a</sup> *Department of Advanced Materials Science, Faculty of Engineering and Design, Kagawa University, 2217-20 Hayashi-cho, Takamatsu-shi, 761-0396 Japan*

<sup>b</sup> *College of Chemistry and Chemical Engineering, Baoji University of Arts and Science, 1 Hi-Tech Avenue, Baoji, Shaanxi, 721013 PR China*

<sup>c</sup> *School of Materials Science and Engineering, Shaanxi University of Science and Technology, Weiyang, Xi'an, Shaanxi, 710021 PR China*

\* Corresponding author. E-mail: feng@eng.kagawa-u.ac.jp; Fax: +81 (0)87-864-2402; Tel: +81 (0)87-864-2438

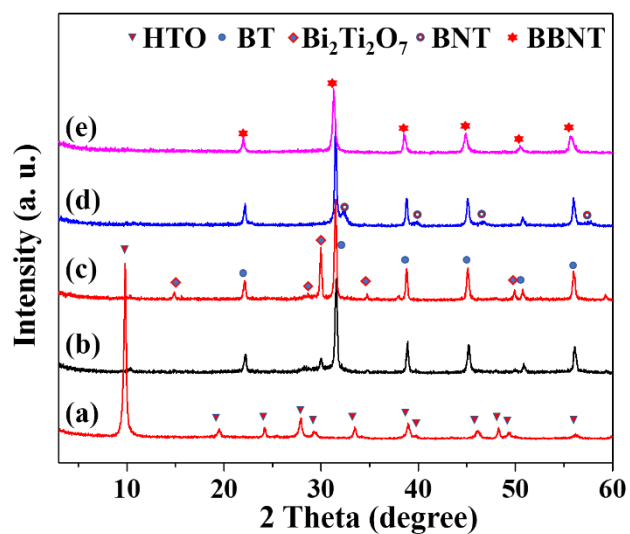

Fig. S1. XRD patterns of (a) layered titanate HTO precursor and samples obtained by hydrothermally treating HTO- $\text{Ba}(\text{OH})_2$ - $\text{BiCl}_3$  mixture with mole ratio of Ba/Bi/Ti = 2/1/4 in (b) 2, (c) 4, (d) 8, and (e) in 15 mol/L NaOH solutions at 200 °C for 12 h.

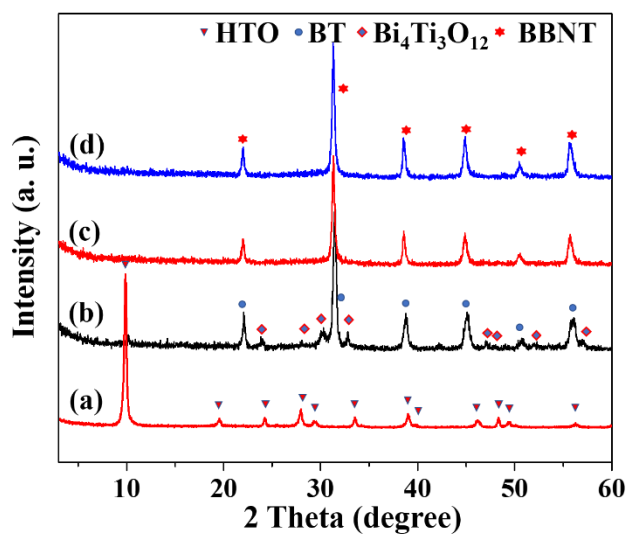

Fig. S2. XRD patterns of (a) layered titanate HTO precursor and samples obtained by hydrothermally treating HTO- $\text{Ba}(\text{OH})_2$ - $\text{BiCl}_3$  mixture in 15 mol/L NaOH solutions at 200 °C for (b) 0.5, (c) 6, and (d) 12 h.

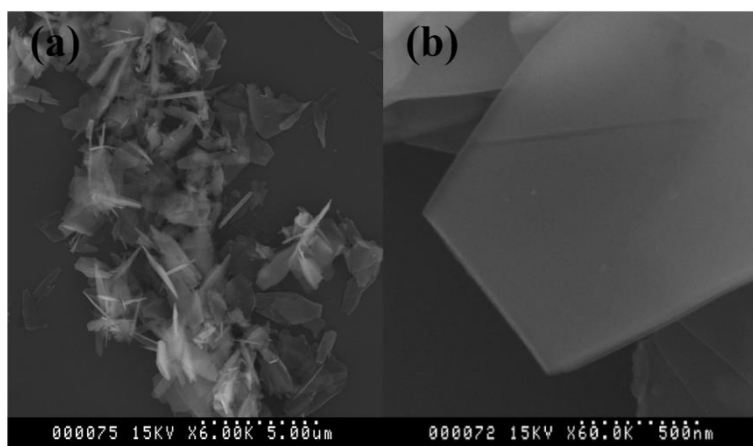

Fig. S3. FE-SEM images of HTO precursor.

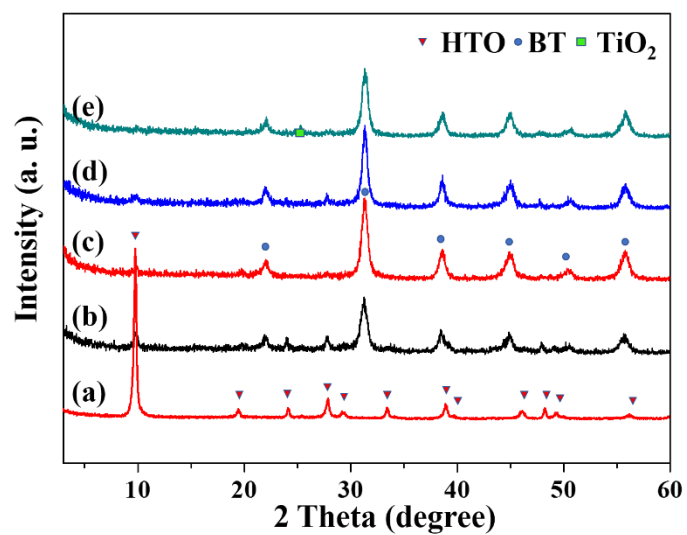

Fig. S4. XRD patterns of (a) layered titanate HTO precursor and BT/HTO samples obtained by solvothermal treatments of HTO-Ba(OH)<sub>2</sub> mixture with Ba/Ti=1/2 at (b) 100, (c) 125, (d) 150, and (e) 175 °C for 12 h in mixed solvent of water/ethanol=2/28, respectively.

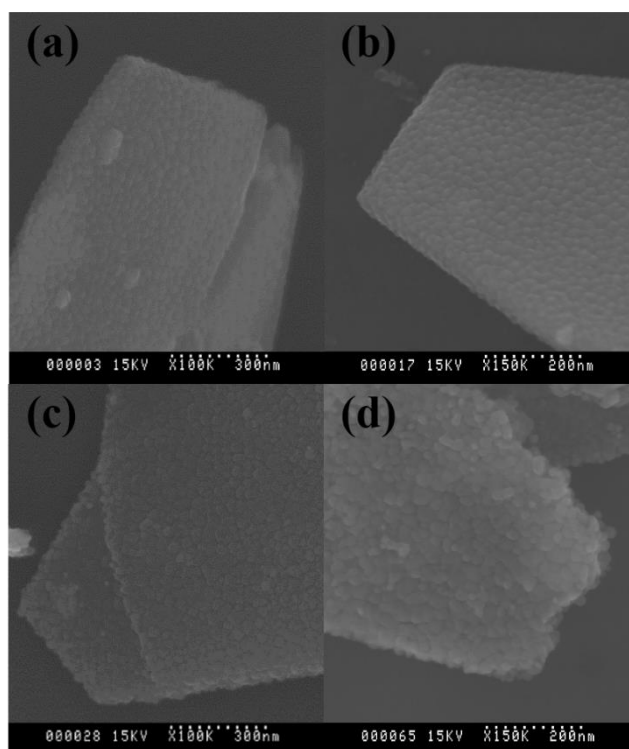

**Fig. S5.** FE-SEM images of BT/HTO samples obtained by solvothermal treatment of HTO-Ba(OH)<sub>2</sub> mixture with Ba/Ti = 1/2 at (a) 100, (b) 125, (c) 150, and (d) 175 °C for 12 h in mixed solvent of water/ethanol = 2/28.

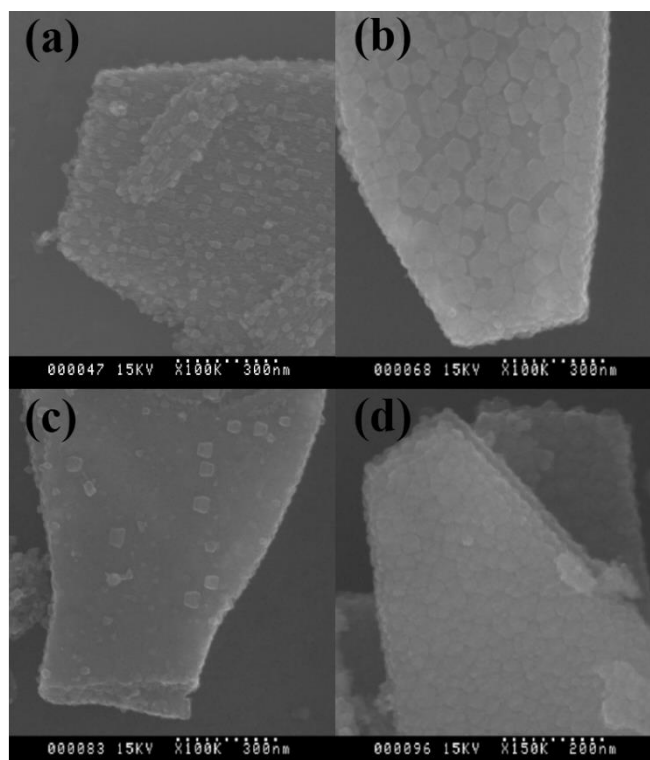

**Fig. S6.** FE-SEM images of BT/HTO samples obtained by solvothermal treatment of HTO-Ba(OH)<sub>2</sub> mixture with Ba/Ti mole ratios of (a) 1/8, (b) 1/4, (c) 3/4, and (d) 1/1 at 150 °C for 12 h.

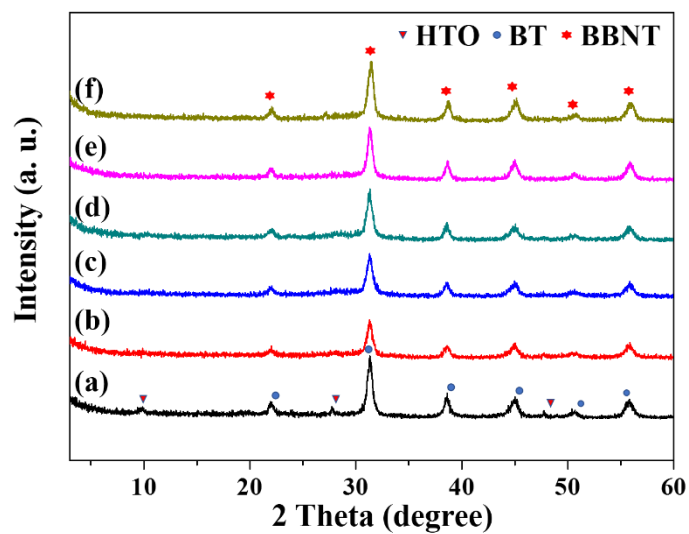

Fig. S7. XRD patterns of (a) BT/HTO and products obtained by the hydrothermal treatment of BT/HTO-1/2-BiCl<sub>3</sub> mixture in 15 mol/L NaOH solution at (b) 100, (c) 125, (d) 150, (e) 175, and (f) 200 °C for 12 h.

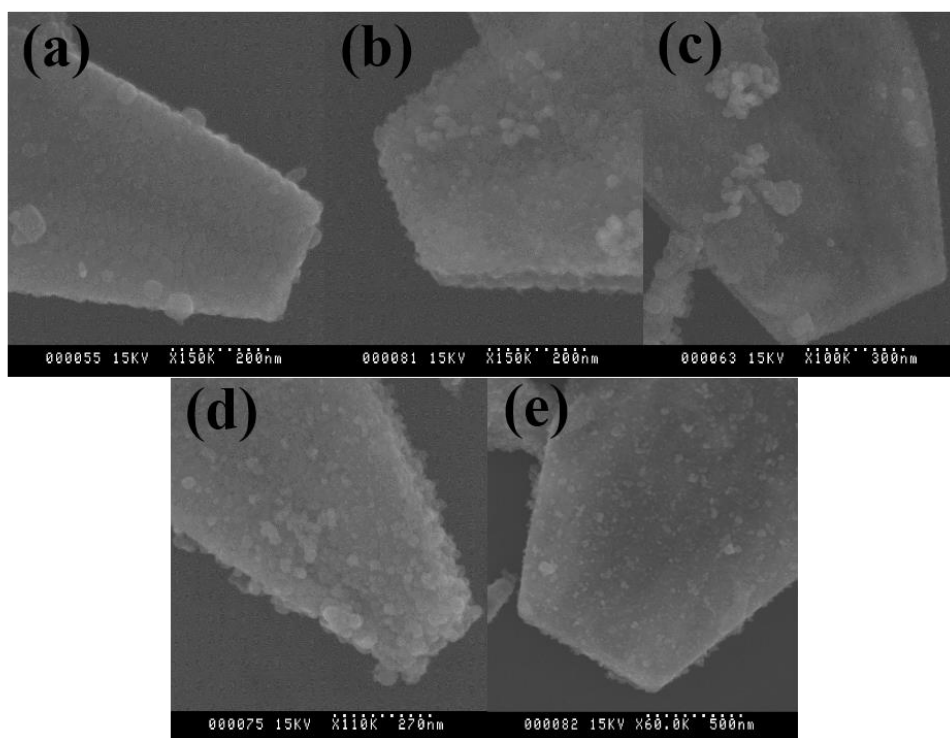

Fig. S8. FE-SEM images of products obtained by the hydrothermal treatment of BT/HTO-1/2-BiCl<sub>3</sub> mixture in 15 mol/L NaOH solution at (a) 100, (b) 125, (c) 150, (d) 175, and (e) 200 °C for 12 h.

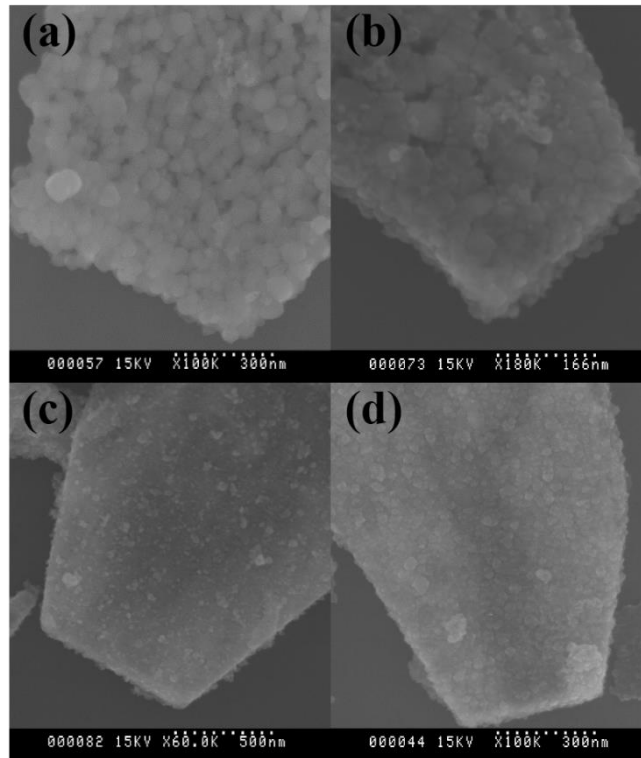

Fig. S9. FE-SEM images of samples obtained by hydrothermal treatments of BT/HTO-X-BiCl<sub>3</sub> mixtures in 15 mol/L NaOH solution at 200 °C for 12 h, where X is (a) 1/8, (b) 1/4, (c) 1/2, and (d) 3/4.

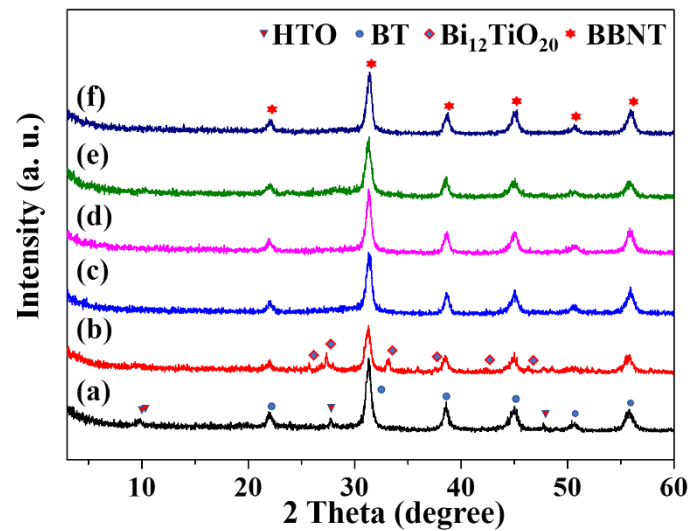

Fig. S10. XRD patterns of (a) BT/HTO-1/2 and products obtained by hydrothermal treatment of BT/HTO-1/2-BiCl<sub>3</sub> mixture in 15 mol/L NaOH solution at 200 °C for (b) 0.5, (c) 3, (d) 6, (e) 12, and (f) 24 h.

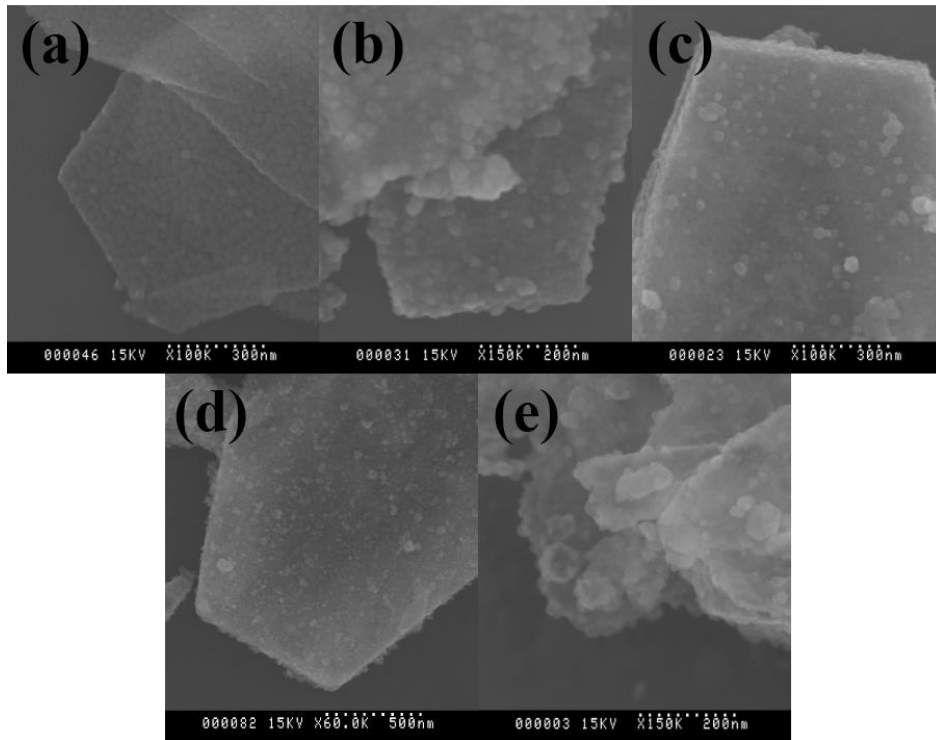

**Fig. S11.** FE-SEM images of products obtained by hydrothermal treatment of BT/HTO-1/2-BiCl<sub>3</sub> mixture in 15 mol/L NaOH solution at 200 °C for (a) 0.5, (b) 3, (c) 6, (d) 12, and (e) 24 h.

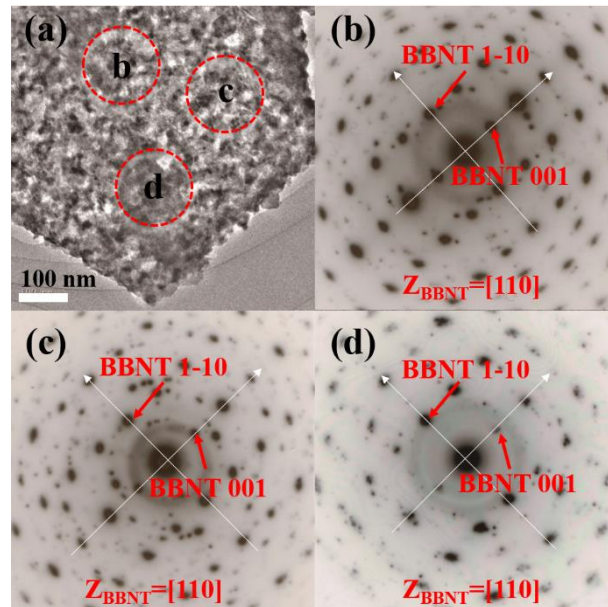

**Fig. S12.** TEM images of (a) BBNT platelike particle obtained by hydrothermal treatment of BT/HTO-1/2-BiCl<sub>3</sub> mixture in 15 mol/L NaOH solution at 200 °C for 12 h, and SAED patterns (b, c, d) at different positions in one platelike particle.

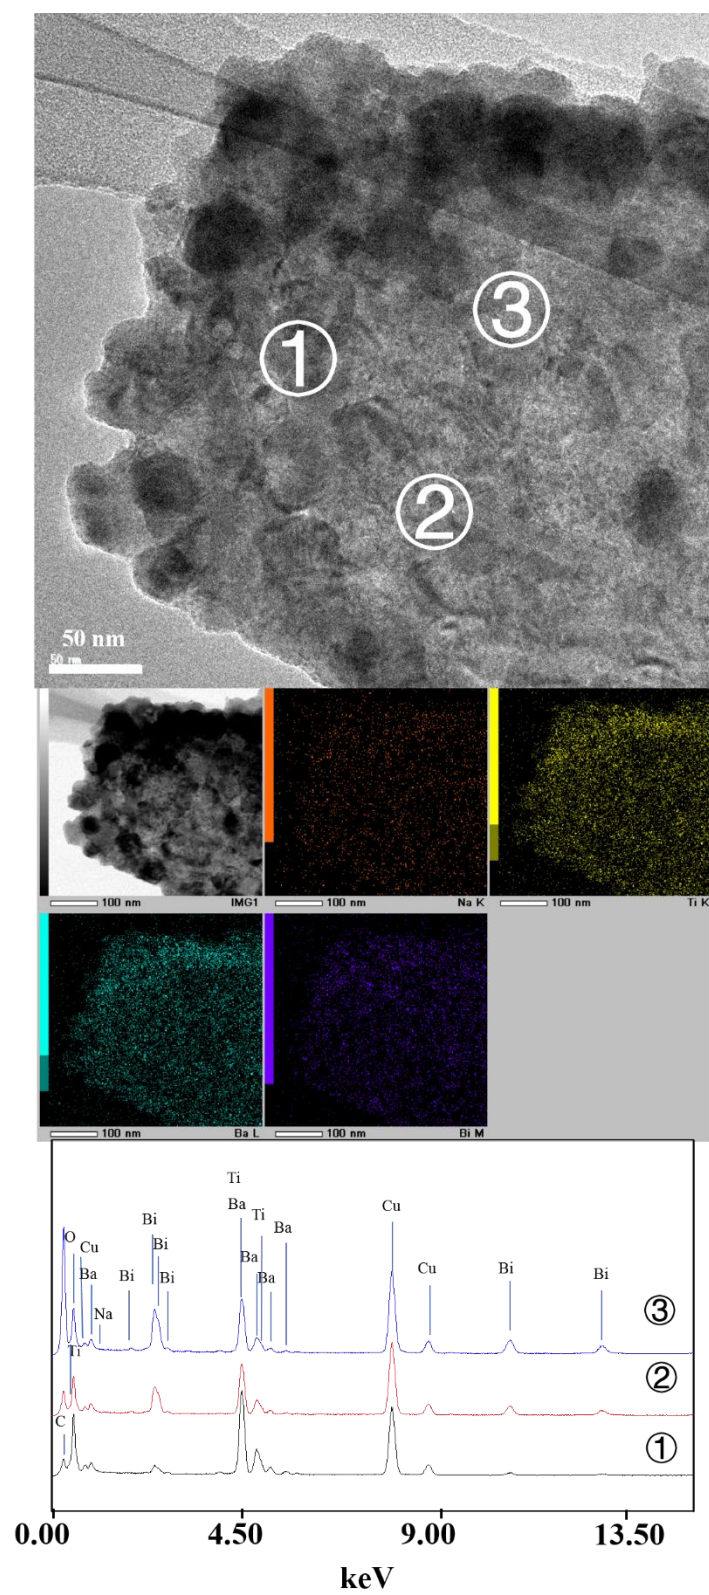

**Fig. S13.** TEM image and EDS spectra at different positions of BBNT platelike particle obtained by hydrothermal treatment of BT/HTO-1/2-BiCl<sub>3</sub> mixture in 15 mol/L NaOH solution at 200 °C for 12 h.
